# Supplementary material for: Early Plasmapheresis Among Patients With Hypertriglyceridemia–Associated Acute Pancreatitis
Source: PubMed Central journal article supplement (PMC10308255; doi:10.1001/jamanetworkopen.2023.20802), 2023-06-28
Supplement: jamanetwopen-e2320802-s001.pdf [file jamanetwopen-e2320802-s001.pdf]

## Supplemental Online Content

Cao L, Chen Y, Liu S, et al; Chinese Acute Pancreatitis Clinical Trials Group (CAPCTG). Early plasmapheresis among patients with hypertriglyceridemia-associated acute pancreatitis. *JAMA Netw Open*. 2023;6(6):e2320802.  
doi:10.1001/jamanetworkopen.2023.20802

**eTable 1.** Plasmapheresis Procedure

**eTable 2.** Outcomes of Plasmapheresis and Conventional Groups After IPTW

**eFigure 1.** Standardized Mean Difference (SMD) of Variables Before and After Propensity Score Matching and Weighting

**eFigure 2.** Daily CRP Level in Matched Cohort

**eFigure 3.** Daily SOFA Score in Matched Cohort

This supplemental material has been provided by the authors to give readers additional information about their work.

**eTable 1. Plasmapheresis Procedure**

| Characteristic of plasmapheresis procedure |                 |
|--------------------------------------------|-----------------|
| Type                                       |                 |
| TPE                                        | 50(89)          |
| DFPP                                       | 6(11)           |
| Initial time                               |                 |
| Day1                                       | 40(71)          |
| Day2                                       | 13(23)          |
| After day2                                 | 3(5)            |
| Times                                      | 1(1,1)          |
| Plasma Volume, (ml)                        | 2000(2000,2700) |
| Time/Procedure, (h)                        | 2.5(2.0,3.0)    |

Abbreviations: TPE, therapeutic plasma exchange; DFPP, double filtration plasmapheresis; IQR, interquartile ranges. Continuous normally distributed data were presented as mean (SDs). Skewed continuous data were presented as medians (IQRs). Categorical data were presented as n (%).

**eTable 2. Outcomes of Plasmapheresis and Conventional Groups After IPTW.**

| Characteristic                            | Plasmapheresis     | Conventional      | P     |
|-------------------------------------------|--------------------|-------------------|-------|
| <i>Primary outcome</i>                    |                    |                   |       |
| OFFD to day14, median(IQR)                | 12.5 (9.0, 14.0)   | 13.0 (10.0, 14.0) | .19   |
| <i>Secondary outcomes</i>                 |                    |                   |       |
| New-onset OF to day14, (n, %)             | 120(42.4)          | 106 (34.2)        | .35   |
| SOFA <sub>RANK</sub> , median(IQR)        | -11.0 (-25.0, 0.0) | -5.9 (-23.1, 2.0) | .25   |
| ΔSOFA <sub>max</sub> , median(IQR)        | 1.0 (0.0, 2.0)     | 1.0 (0.0, 3.0)    | .97   |
| ICU-free days to day14, median(IQR)       | 10.0 (7.0, 11.0)   | 14.0 (7.0, 14.0)  | <.001 |
| Hospital-free days to day 60, median(IQR) | 47.0 (42.2, 52.0)  | 51.0 (46.0, 53.0) | .09   |
| ICU need, (n, %)                          | 264 (93.7)         | 112 (36)          | <.001 |
| 60-Day Mortality, (n, %)                  | 10 (3.4)           | 7 (2.2)           | .55   |
| IPN, (n, %)                               | 22 (7.9)           | 11(3.6)           | .16   |

Abbreviations:IPTW, inverse probability of treatment weighting; PE, plasmapheresis; IQR, interquartile ranges; OFFD, organ failure-free day; OF, organ failure; SOFA, Sequential Organ Failure Assessment; ICU, intensive care unit; IPN, infected pancreatic necrosis

Continuous normally distributed data were presented as mean (SDs). Skewed continuous data were presented as medians (IQRs). Categorical data were presented as n (%).

**eFigure 1. Standardized Mean Difference (SMD) of Variables Before and After Propensity Score Matching and Weighting**

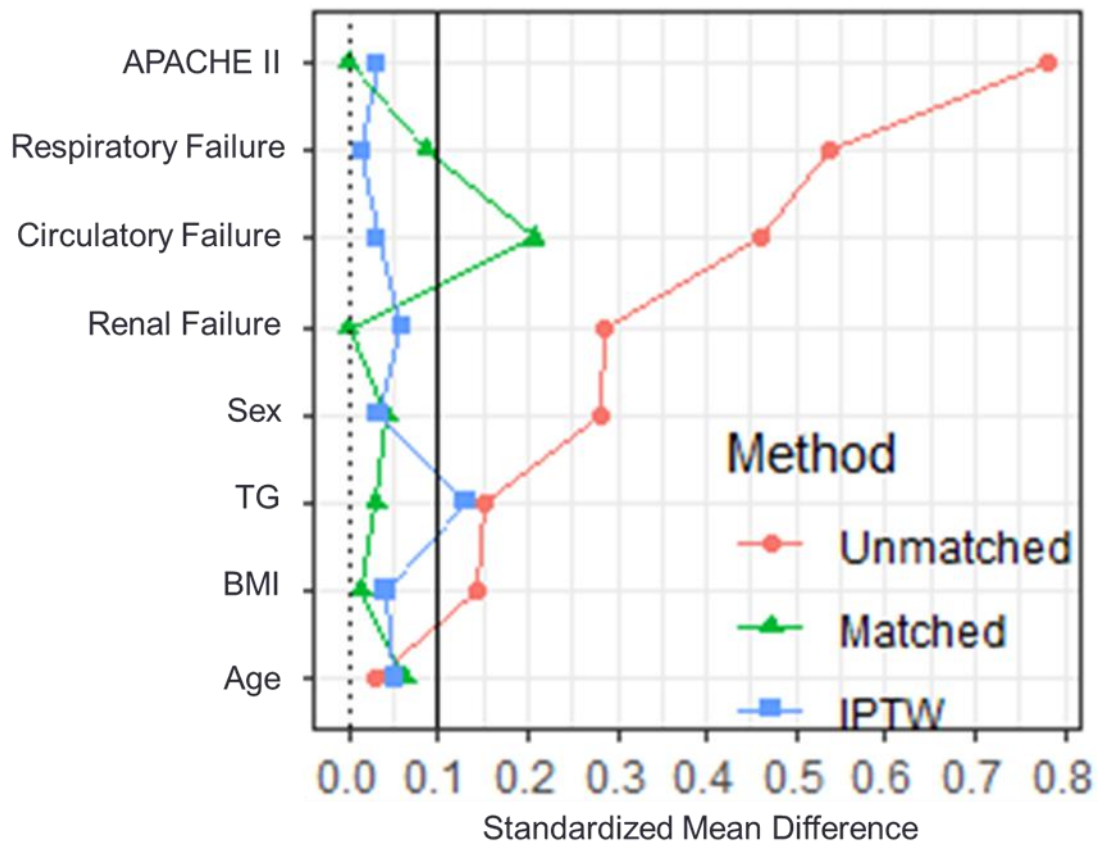

**eFigure 2. Daily CRP Level in Matched Cohort**

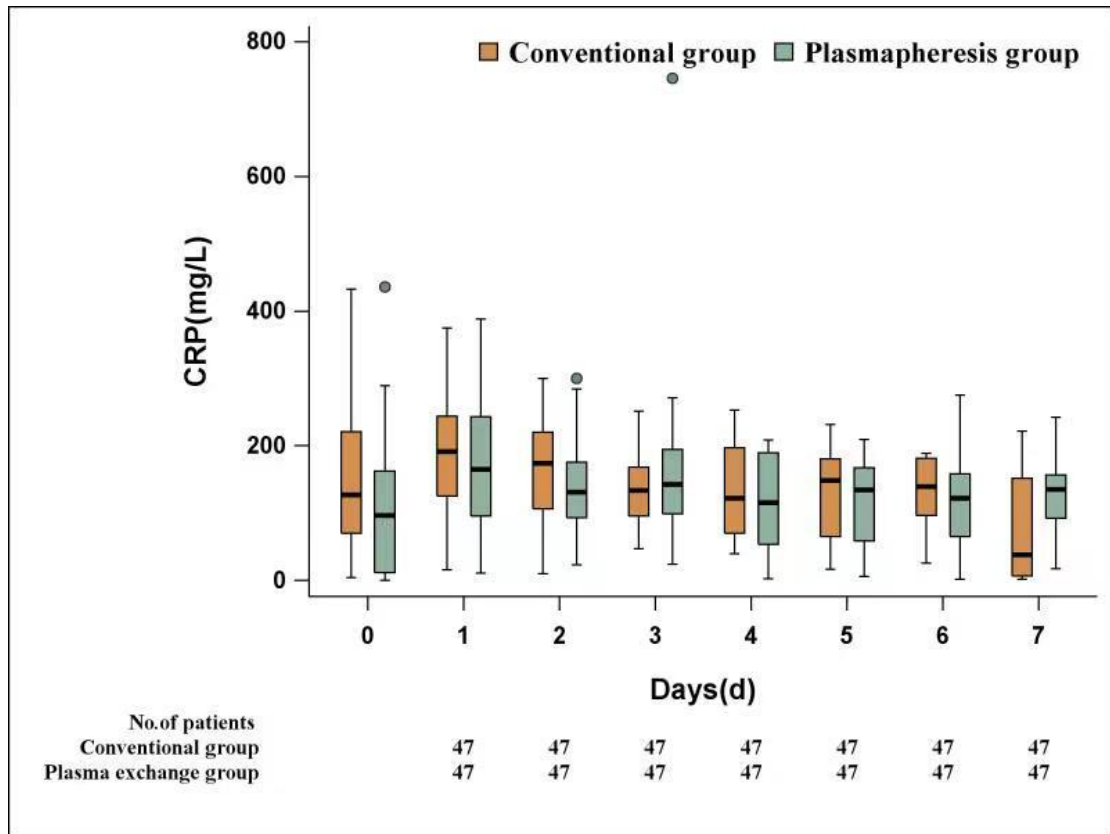

CRP denotes C-reactive protein; IQR denotes interquartile range.

Boxes represent medians and interquartile ranges, whiskers extend to the lowest and highest observations within 1.5 × interquartile range (IQR), and the circles represent outlier observation

**eFigure 3. Daily SOFA Score in Matched Cohort**

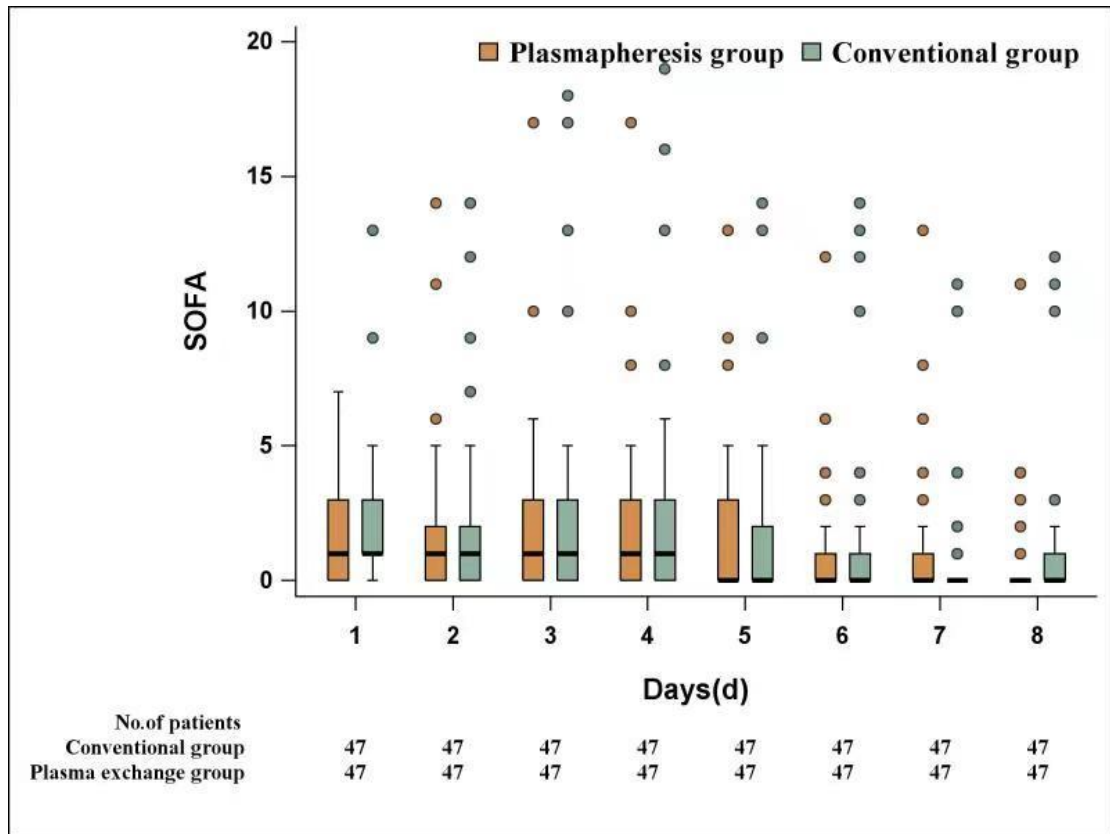

SOFA denotes sequential organ failure assessment; IQR denotes interquartile range.

Boxes represent medians and interquartile ranges, whiskers extend to the lowest and highest observations within 1.5 × IQR, and the circles represent outlier observation.
