# Supplementary material for: Early Plasmapheresis Among Patients With Hypertriglyceridemia–Associated Acute Pancreatitis
Source: PubMed Central journal article supplement (PMC10308255; doi:10.1001/jamanetworkopen.2023.20802), 2023-06-28
Supplement: jamanetwopen-e2320802-s002.pdf [file jamanetwopen-e2320802-s002.pdf]

\*First name, last name, and suffix (if applicable) are required and will appear in PubMed.

| <b>*Group Name(s): the Chinese Acute Pancreatitis Clinical Trials Group (CAPCTG)</b> |                   |                              |                  |                                                                       |                                          |                                                         |                                                                                            |
|--------------------------------------------------------------------------------------|-------------------|------------------------------|------------------|-----------------------------------------------------------------------|------------------------------------------|---------------------------------------------------------|--------------------------------------------------------------------------------------------|
| <b>*First Name and Middle Initial(s)</b>                                             | <b>*Last Name</b> | <b>*Suffix (eg, Jr, III)</b> | Academic Degrees | Institution                                                           | Location (city, state/province, country) | Role or Contribution, eg, chair, principal investigator | Group (if more than 1 Group listed in the byline) and/or Subgroup (eg, Steering Committee) |
| Jingchun                                                                             | Song              |                              | PhD              | 94th Hospital of PLA                                                  | Nanchang, Jiangxi, China                 |                                                         |                                                                                            |
| Qingbo                                                                               | Zeng              |                              | PhD              | 94th Hospital of PLA                                                  | Nanchang, Jiangxi, China                 |                                                         |                                                                                            |
| Weili                                                                                | Gu                |                              | PhD              | Affiliated Hospital 2 of Nantong University                           | Nantong, Jiangsu, China                  |                                                         |                                                                                            |
| Weiwei                                                                               | Chen              |                              | PhD              | Clinical Medical College of Yangzhou University                       | Yangzhou, Jiangsu, China                 |                                                         |                                                                                            |
| Qingcheng                                                                            | Xu                |                              | MSc              | Clinical Medical College of Yangzhou University                       | Yangzhou, Jiangsu, China                 |                                                         |                                                                                            |
| Guobing                                                                              | Chen              |                              | PhD              | First People's Hospital of Yunnan Province                            | Kunming, Yunnan, China                   |                                                         |                                                                                            |
| Yafei                                                                                | Li                |                              | MSc              | First People's Hospital of Yunnan Province                            | Kunming, Yunnan, China                   |                                                         |                                                                                            |
| Lijuan                                                                               | Zhao              |                              | PhD              | First People's Hospital of Yunnan Province                            | Kunming, Yunnan, China                   |                                                         |                                                                                            |
| Songjing                                                                             | Shi               |                              | BSc              | Fujian Province Hospital                                              | Fuzhou, Fujian, China                    |                                                         |                                                                                            |
| Weijie                                                                               | Yao               |                              | PhD              | General Hospital of Ningxia Medical University                        | Yinchuan, Ningxia, China                 |                                                         |                                                                                            |
| Xiaofei                                                                              | Huang             |                              | PhD              | Jiangsu Provincial Hospital of Integrated Chinese and Western Medicin | Nanjing, Jiangsu, China                  |                                                         |                                                                                            |
| Haibin                                                                               | Ni                |                              | PhD              | Jiangsu Provincial Hospital of Integrated Chinese and Western Medicin | Nanjing, Jiangsu, China                  |                                                         |                                                                                            |
| Dandan                                                                               | Zhou              |                              | PhD              | Jiangsu Provincial Hospital of Integrated Chinese and Western Medicin | Nanjing, Jiangsu, China                  |                                                         |                                                                                            |
| Mingzhi                                                                              | Chen              |                              | BSc              | Jinjiang Hospital of Traditional Chinese Medicine                     | Quanzhou, Fujian, China                  |                                                         |                                                                                            |
| Yan                                                                                  | Chen              |                              | BSc              | Jinling Hospital, Medical School of Nanjing University                | Nanjing, Jiangsu, China                  |                                                         |                                                                                            |

## Supplemental Online Content: Nonauthor Collaborators

\*First name, last name, and suffix (if applicable) are required and will appear in PubMed.

| *First Name and Middle Initial(s) | *Last Name | *Suffix (eg, Jr, III) | Academic Degrees | Institution                                            | Location (city, state/province, country) | Role or Contribution, eg, chair, principal investigator | Group (if more than 1 Group listed in the byline) and/or Subgroup (eg, Steering Committee) |
|-----------------------------------|------------|-----------------------|------------------|--------------------------------------------------------|------------------------------------------|---------------------------------------------------------|--------------------------------------------------------------------------------------------|
| Mingfeng                          | Huang      |                       | MSc              | Jinling Hospital, Medical School of Nanjing University | Nanjing, Jiangsu, China                  |                                                         |                                                                                            |
| Baiqiang                          | Li         |                       | PhD              | Jinling Hospital, Medical School of Nanjing University | Nanjing, Jiangsu, China                  |                                                         |                                                                                            |
| Jiajia                            | Lin        |                       | PhD              | Jinling Hospital, Medical School of Nanjing University | Nanjing, Jiangsu, China                  |                                                         |                                                                                            |
| Mengjie                           | Lu         |                       | MSc              | Jinling Hospital, Medical School of Nanjing University | Nanjing, Jiangsu, China                  |                                                         |                                                                                            |
| Junli                             | Sun        |                       | PhD              | Luoyang Central Hospital                               | Luoyang, Henan, China                    |                                                         |                                                                                            |
| Keke                              | Xin        |                       | MSc              | Luoyang Central Hospital                               | Luoyang, Henan, China                    |                                                         |                                                                                            |
| Chengjian                         | He         |                       | PhD              | Nanhua Hospital                                        | Hengyang, Hunan, China                   |                                                         |                                                                                            |
| Hongyi                            | Yao        |                       | PhD              | Nanhua Hospital                                        | Hengyang, Hunan, China                   |                                                         |                                                                                            |
| Zigui                             | Zhu        |                       | MSc              | Nanhua Hospital                                        | Hengyang, Hunan, China                   |                                                         |                                                                                            |
| Fang                              | Shao       |                       | PhD              | Nanjing Medical University                             | Nanjing, Jiangsu, China                  |                                                         |                                                                                            |
| Yun                               | Zhou       |                       | BSc              | Pingxiang People's Hospital                            | Pingxiang, Jiangxi, China                |                                                         |                                                                                            |
| Guixian                           | Luo        |                       | BSc              | Qianxinan People's Hospital                            | Xingyi, Guizhou, China                   |                                                         |                                                                                            |
| Xiaomei                           | Chen       |                       | PhD              | Qilu Hospital of Shandong University                   | Jinan, Shandong, China                   |                                                         |                                                                                            |
| Xiangyang                         | Zhao       |                       | PhD              | Qilu Hospital of Shandong University                   | Jinan, Shandong, China                   |                                                         |                                                                                            |
| Wei                               | Zhao       |                       | MSc              | Qilu Hospital of Shandong University                   | Jinan, Shandong, China                   |                                                         |                                                                                            |
| Long                              | Fu         |                       | PhD              | Shangqiu First People's Hospital                       | Shangqiu, Henan, China                   |                                                         |                                                                                            |
| Shumin                            | Tu         |                       | PhD              | Shangqiu First People's Hospital                       | Shangqiu, Henan, China                   |                                                         |                                                                                            |
| Bing                              | Xue        |                       | MSc              | Shangqiu First People's Hospital                       | Shangqiu, Henan, China                   |                                                         |                                                                                            |
| Yongjun                           | Lin        |                       | MSc              | Sir Run Run Shaw Hospital of Zhejiang University       | Hangzhou, Zhejiang, China                |                                                         |                                                                                            |
| Xinting                           | Pan        |                       | PhD              | The Affiliated Hospital of Qingdao University          | Qingdao, Shandong, China                 |                                                         |                                                                                            |
| Youdong                           | Wan        |                       | PhD              | The Affiliated Hospital of Qingdao University          | Qingdao, Shandong, China                 |                                                         |                                                                                            |

## Supplemental Online Content: Nonauthor Collaborators

\*First name, last name, and suffix (if applicable) are required and will appear in PubMed.

| *First Name and Middle Initial(s) | *Last Name | *Suffix (eg, Jr, III) | Academic Degrees | Institution                                                                                                  | Location (city, state/province, country) | Role or Contribution, eg, chair, principal investigator | Group (if more than 1 Group listed in the byline) and/or Subgroup (eg, Steering Committee) |
|-----------------------------------|------------|-----------------------|------------------|--------------------------------------------------------------------------------------------------------------|------------------------------------------|---------------------------------------------------------|--------------------------------------------------------------------------------------------|
| Qingyun                           | Zhu        |                       | PhD              | The Affiliated Hospital of Qingdao University                                                                | Qingdao, Shandong, China                 |                                                         |                                                                                            |
| Miao                              | Chen       |                       | PhD              | The Affiliated Hospital of Zunyi Medical University                                                          | Zunyi, Guizhou, China                    |                                                         |                                                                                            |
| Kang                              | Li         |                       | PhD              | The Affiliated Hospital of Zunyi Medical University                                                          | Zunyi, Guizhou, China                    |                                                         |                                                                                            |
| Hong                              | Mei        |                       | PhD              | The Affiliated Hospital of Zunyi Medical University                                                          | Zunyi, Guizhou, China                    |                                                         |                                                                                            |
| Dahuan                            | Li         |                       | PhD              | The First Affiliated Hospital and College of Clinical Medicine of Henan University of Science and Technology | Luoyang, Henan, China                    |                                                         |                                                                                            |
| Lening                            | Ren        |                       | MSc              | The First Affiliated Hospital and College of Clinical Medicine of Henan University of Science and Technology | Luoyang, Henan, China                    |                                                         |                                                                                            |
| Guoxiu                            | Zhang      |                       | PhD              | The First Affiliated Hospital and College of Clinical Medicine of Henan University of Science and Technology | Luoyang, Henan, China                    |                                                         |                                                                                            |
| Min                               | Shao       |                       | PhD              | The First Affiliated Hospital of Anhui Medical University                                                    | Hefei, Anhui, China                      |                                                         |                                                                                            |
| Dongsheng                         | Zhao       |                       | MSc              | The First Affiliated Hospital of Anhui Medical University                                                    | Hefei, Anhui, China                      |                                                         |                                                                                            |
| Zhenping                          | Chen       |                       | BSc              | The First Affiliated Hospital of Nanchang University                                                         | Nanchang, Jiangxi, China                 |                                                         |                                                                                            |
| Wenhua                            | He         |                       | PhD              | The First Affiliated Hospital of Nanchang University                                                         | Nanchang, Jiangxi, China                 |                                                         |                                                                                            |
| Nonghua                           | Lv         |                       | PhD              | The First Affiliated Hospital of Nanchang University                                                         | Nanchang, Jiangxi, China                 |                                                         |                                                                                            |
| Liang                             | Xia        |                       | PhD              | The First Affiliated Hospital of Nanchang University                                                         | Nanchang, Jiangxi, China                 |                                                         |                                                                                            |

## Supplemental Online Content: Nonauthor Collaborators

\*First name, last name, and suffix (if applicable) are required and will appear in PubMed.

| *First Name and Middle Initial(s) | *Last Name | *Suffix (eg, Jr, III) | Academic Degrees | Institution                                                                        | Location (city, state/province, country) | Role or Contribution, eg, chair, principal investigator | Group (if more than 1 Group listed in the byline) and/or Subgroup (eg, Steering Committee) |
|-----------------------------------|------------|-----------------------|------------------|------------------------------------------------------------------------------------|------------------------------------------|---------------------------------------------------------|--------------------------------------------------------------------------------------------|
| Yin                               | Zhu        |                       | PhD              | The First Affiliated Hospital of Nanchang University                               | Nanchang, Jiangxi, China                 |                                                         |                                                                                            |
| Qiang                             | Li         |                       | PhD              | The First Affiliated Hospital of Nanjing Medical University                        | Nanjing, Jiangsu, China                  |                                                         |                                                                                            |
| Honghai                           | Xia        |                       | PhD              | The First Affiliated Hospital of the University of Science and Technology of China | Hefei, Anhui, China                      |                                                         |                                                                                            |
| Dongliang                         | Yang       |                       | PhD              | The First Affiliated Hospital of the University of Science and Technology of China | Hefei, Anhui, China                      |                                                         |                                                                                            |
| Shusheng                          | Zhou       |                       | PhD              | The First Affiliated Hospital of the University of Science and Technology of China | Hefei, Anhui, China                      |                                                         |                                                                                            |
| Weihua                            | Lu         |                       | PhD              | The First Affiliated Hospital of Wannan Medical College                            | Wuhu, Anhui, China                       |                                                         |                                                                                            |
| Jingyi                            | Wu         |                       | PhD              | The First Affiliated Hospital of Wannan Medical College                            | Wuhu, Anhui, China                       |                                                         |                                                                                            |
| Feng                              | Zhou       |                       | MSc              | The First Affiliated Hospital of Wannan Medical College                            | Wuhu, Anhui, China                       |                                                         |                                                                                            |
| Jiyan                             | Lin        |                       | PhD              | The First Affiliated Hospital of Xiamen University                                 | Xiamen, Fujian, China                    |                                                         |                                                                                            |
| Quanxing                          | Feng       |                       | PhD              | The Fourth Military Medical University                                             | Xian, Shanxi, China                      |                                                         |                                                                                            |
| Mei                               | Yang       |                       | PhD              | The Qujing NO1 People's Hospital                                                   | Qujing, Yunnan, China                    |                                                         |                                                                                            |
| Hong                              | Gao        |                       | MSc              | The Qujing NO1 People's Hospital                                                   | Qujing, Yunnan, China                    |                                                         |                                                                                            |
| Shan                              | Xu         |                       | MSc              | The Second Affiliated Hospital of Chongqing Medical University                     | Chongqing, China                         |                                                         |                                                                                            |
| Lei                               | Yu         |                       | PhD              | The Second Affiliated Hospital of Chongqing Medical University                     | Chongqing, China                         |                                                         |                                                                                            |
| Bin                               | Wu         |                       | PhD              | The Third Hospital of Xiamen City                                                  | Xiamen, Fujian, China                    |                                                         |                                                                                            |
| Huaguang                          | Ye         |                       | MSc              | The Third Hospital of Xiamen City                                                  | Xiamen, Fujian, China                    |                                                         |                                                                                            |
| Zhiyong                           | Liu        |                       | PhD              | Xiangya Hospital                                                                   | Changsha, Hunan, China                   |                                                         |                                                                                            |

Supplemental Online Content: Nonauthor Collaborators

\*First name, last name, and suffix (if applicable) are required and will appear in PubMed.

| <b>*First Name and Middle Initial(s)</b> | <b>*Last Name</b> | <b>*Suffix (eg, Jr, III)</b> | Academic Degrees | Institution                           | Location (city, state/province, country) | Role or Contribution, eg, chair, principal investigator | Group (if more than 1 Group listed in the byline) and/or Subgroup (eg, Steering Committee) |
|------------------------------------------|-------------------|------------------------------|------------------|---------------------------------------|------------------------------------------|---------------------------------------------------------|--------------------------------------------------------------------------------------------|
| Jianfeng                                 | Tu                |                              | PhD              | Zhejiang Provincial People's Hospital | Hangzhou, Zhejiang, China                |                                                         |                                                                                            |
| Hongguo                                  | Yang              |                              | MSc              | Zhejiang Provincial People's Hospital | Hangzhou, Zhejiang, China                |                                                         |                                                                                            |
