# Supplementary material for: Early Plasmapheresis Among Patients With Hypertriglyceridemia–Associated Acute Pancreatitis
Source: PubMed Central journal article supplement (PMC10308255; doi:10.1001/jamanetworkopen.2023.20802), 2023-06-28
Supplement: jamanetwopen-e2320802-s003.pdf [file jamanetwopen-e2320802-s003.pdf]

## Data Sharing Statement

Cao. Early Plasmapheresis Among Patients With Hypertriglyceridemia–Associated Acute Pancreatitis. *JAMA Netw Open*. Published June 28, 2023.

doi:10.1001/jamanetworkopen.2023.20802

### Data

**Data available:** No

### Additional Information

**Explanation for why data not available:** Deidentified individual participant data are available indefinitely in the electronic database. Data can be accessed through [capctg.medbit.cn](http://capctg.medbit.cn) with the approval of the authors. Request for data can be made to the corresponding author ([ctgchina@medbit.cn](mailto:ctgchina@medbit.cn)) and will be discussed during a meeting of the Chinese Acute Pancreatitis Clinical Trials Group (CAPCTG).
